# Supplementary figures and images for: Janus droplet microreactors for preparing polyaniline/AgCl nanocomposites
Source: Royal Society of Chemistry journal article supplement (doi:10.1039/d4cc01321b), 2024-01-01

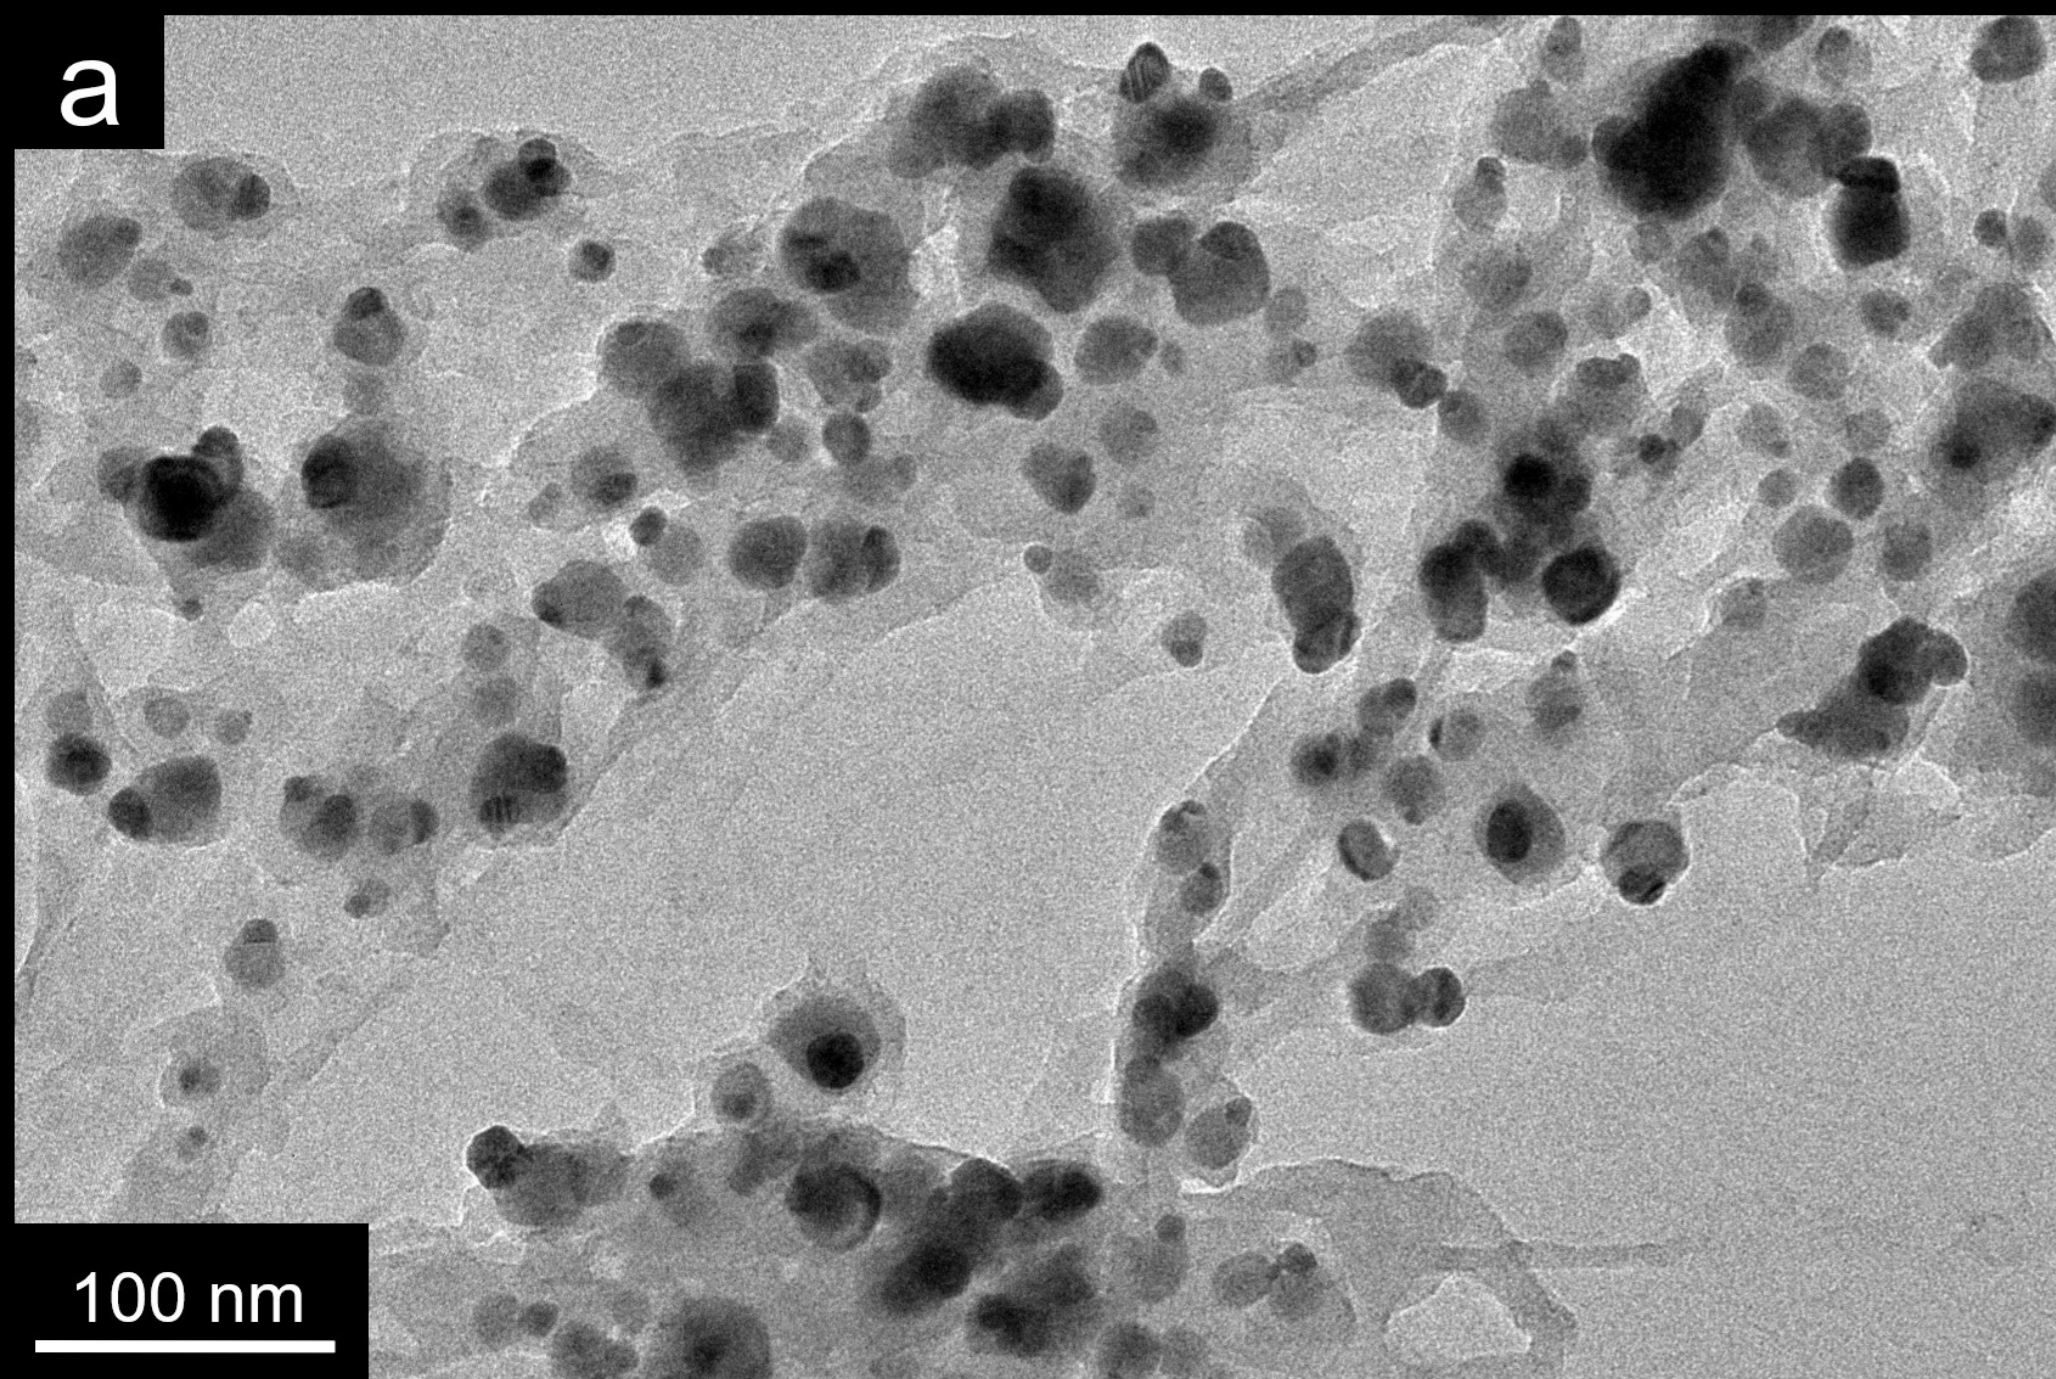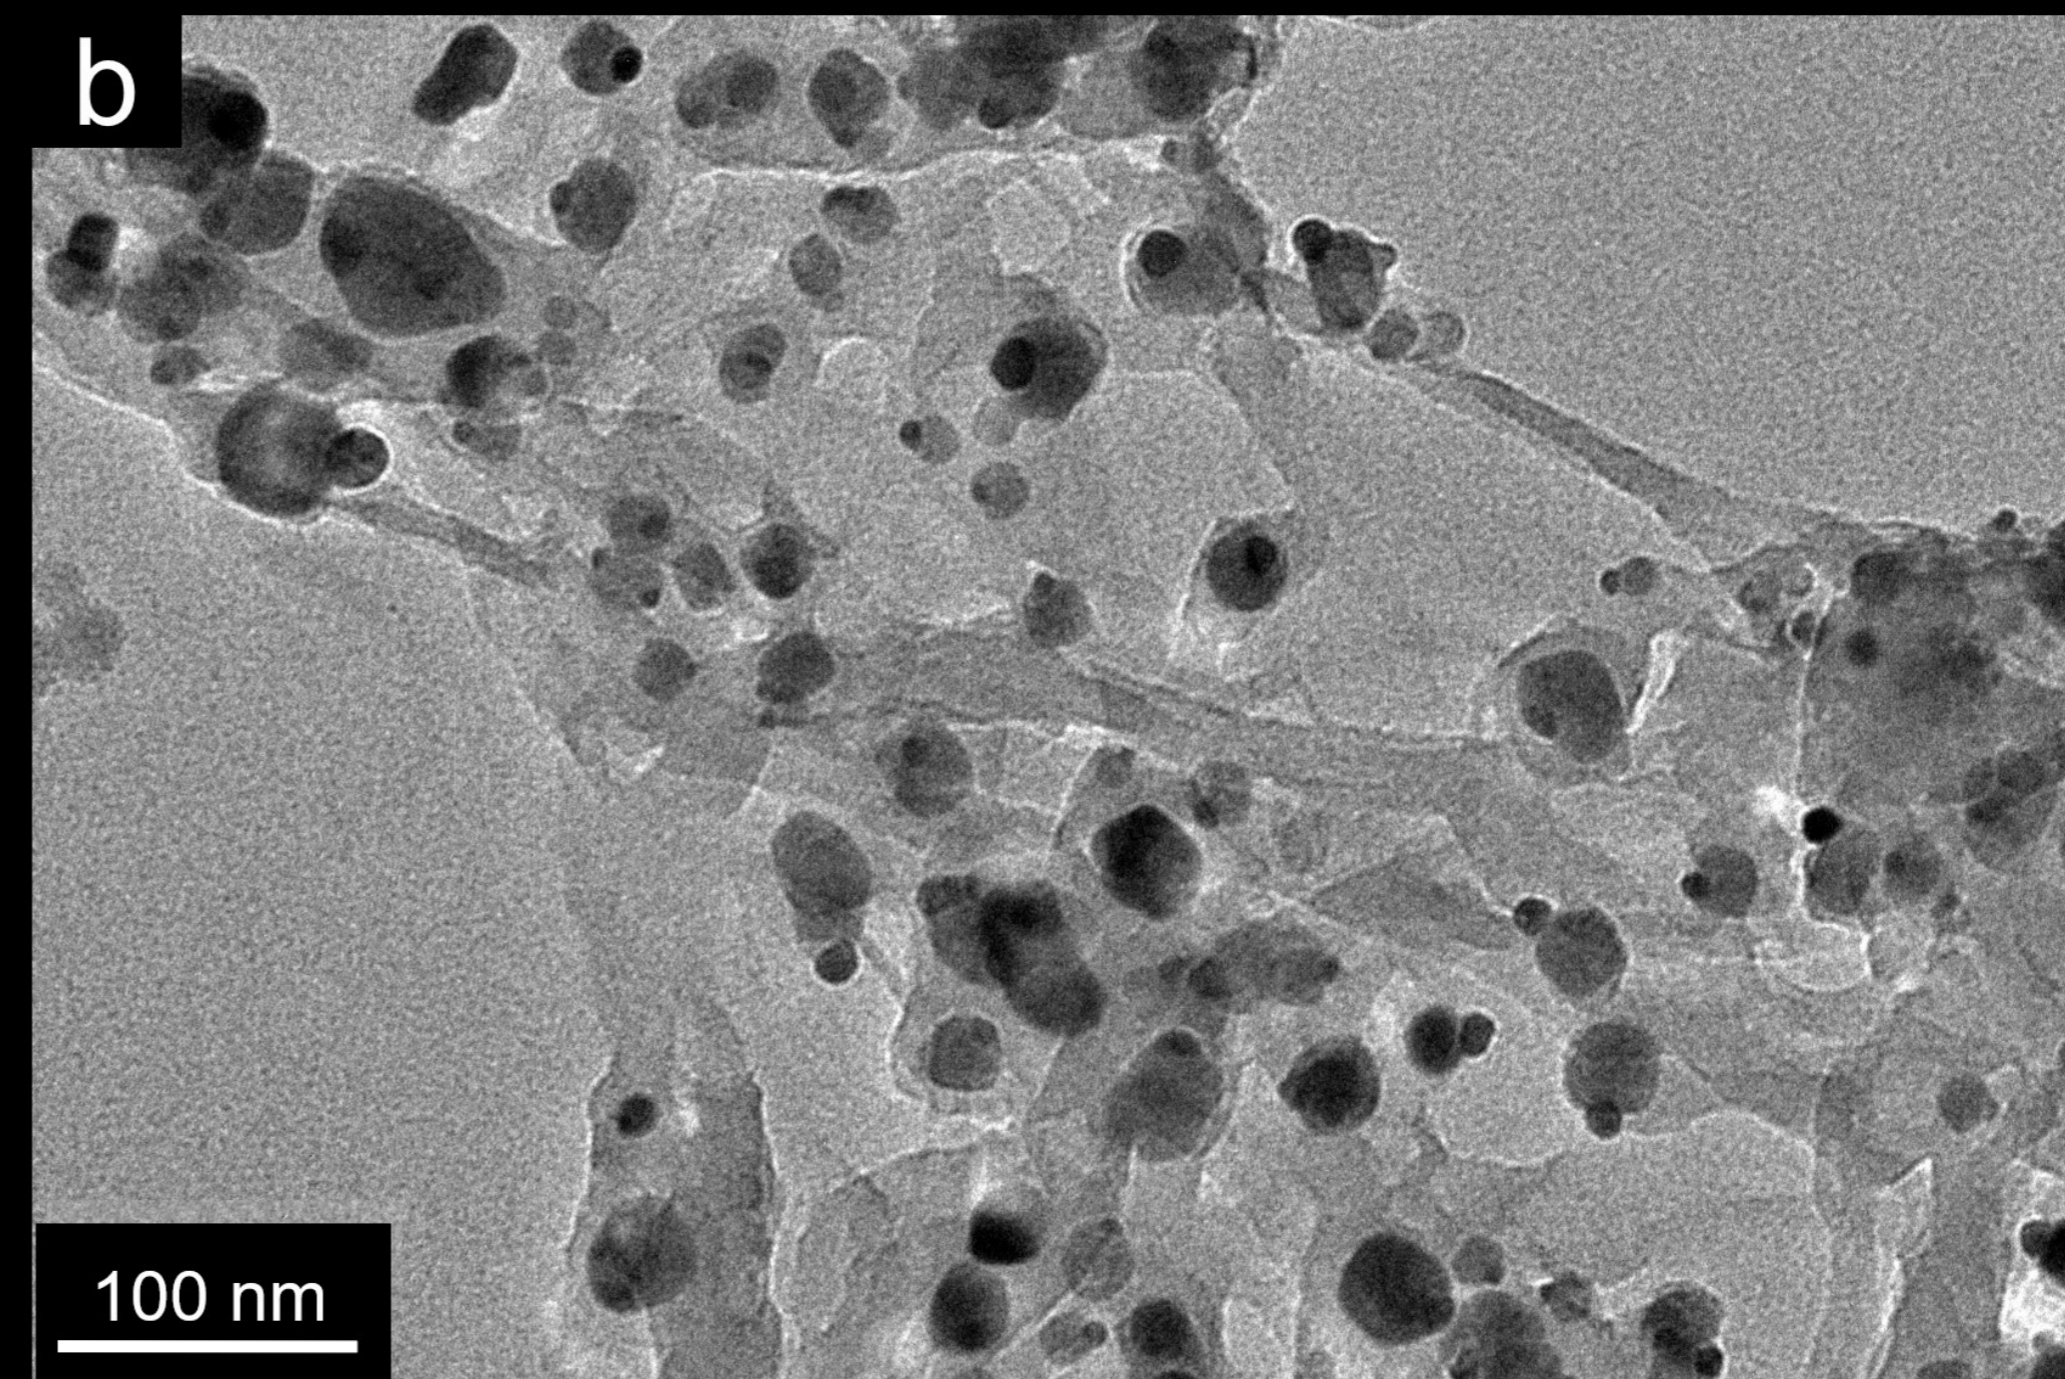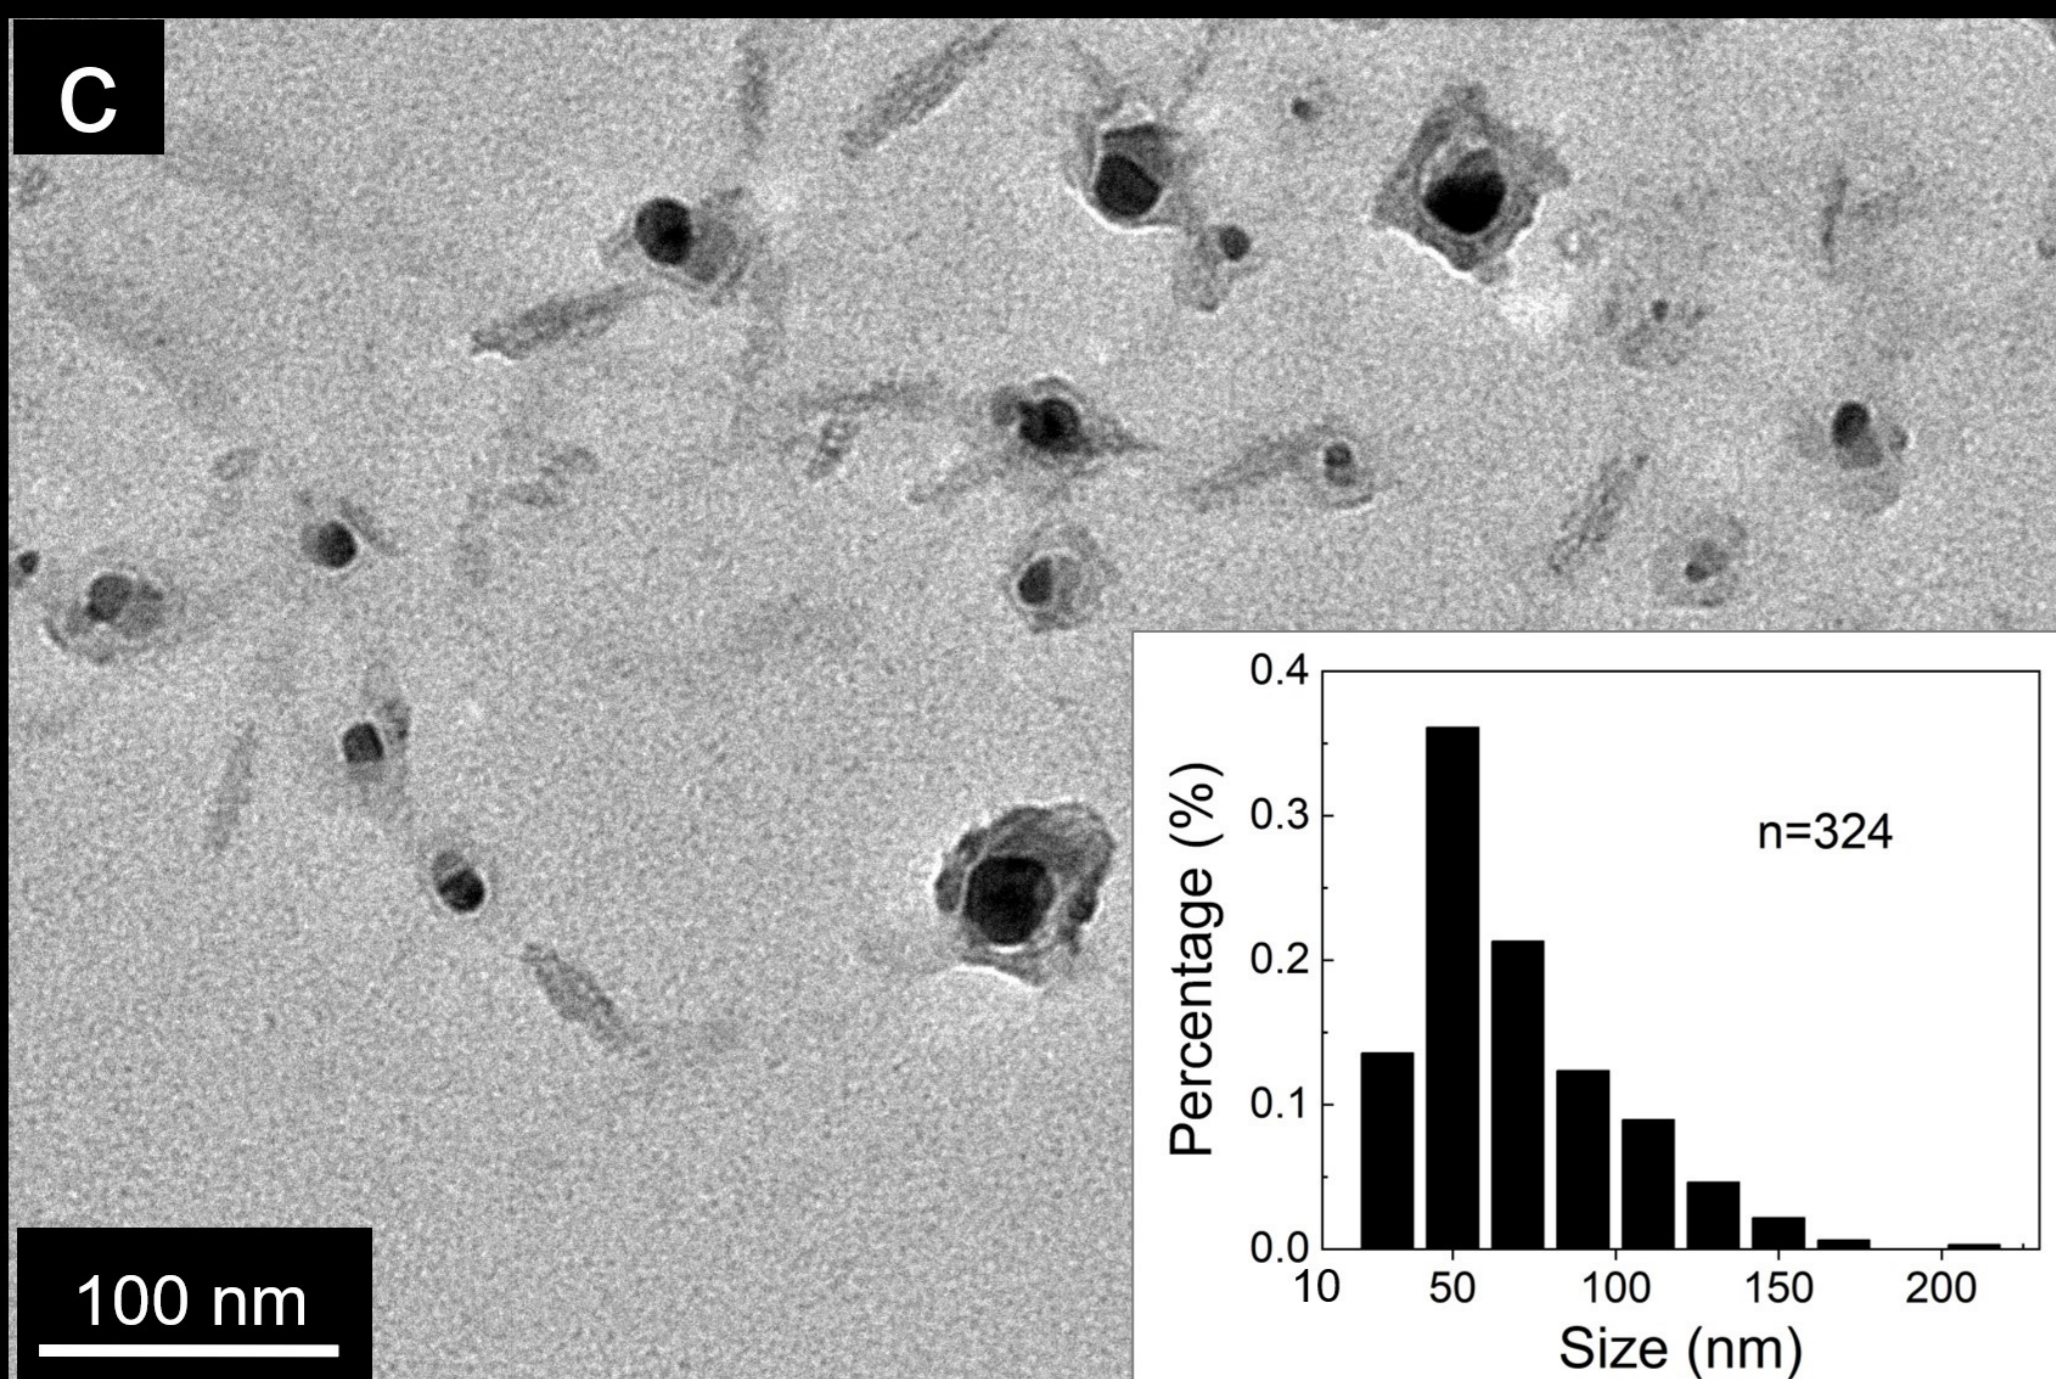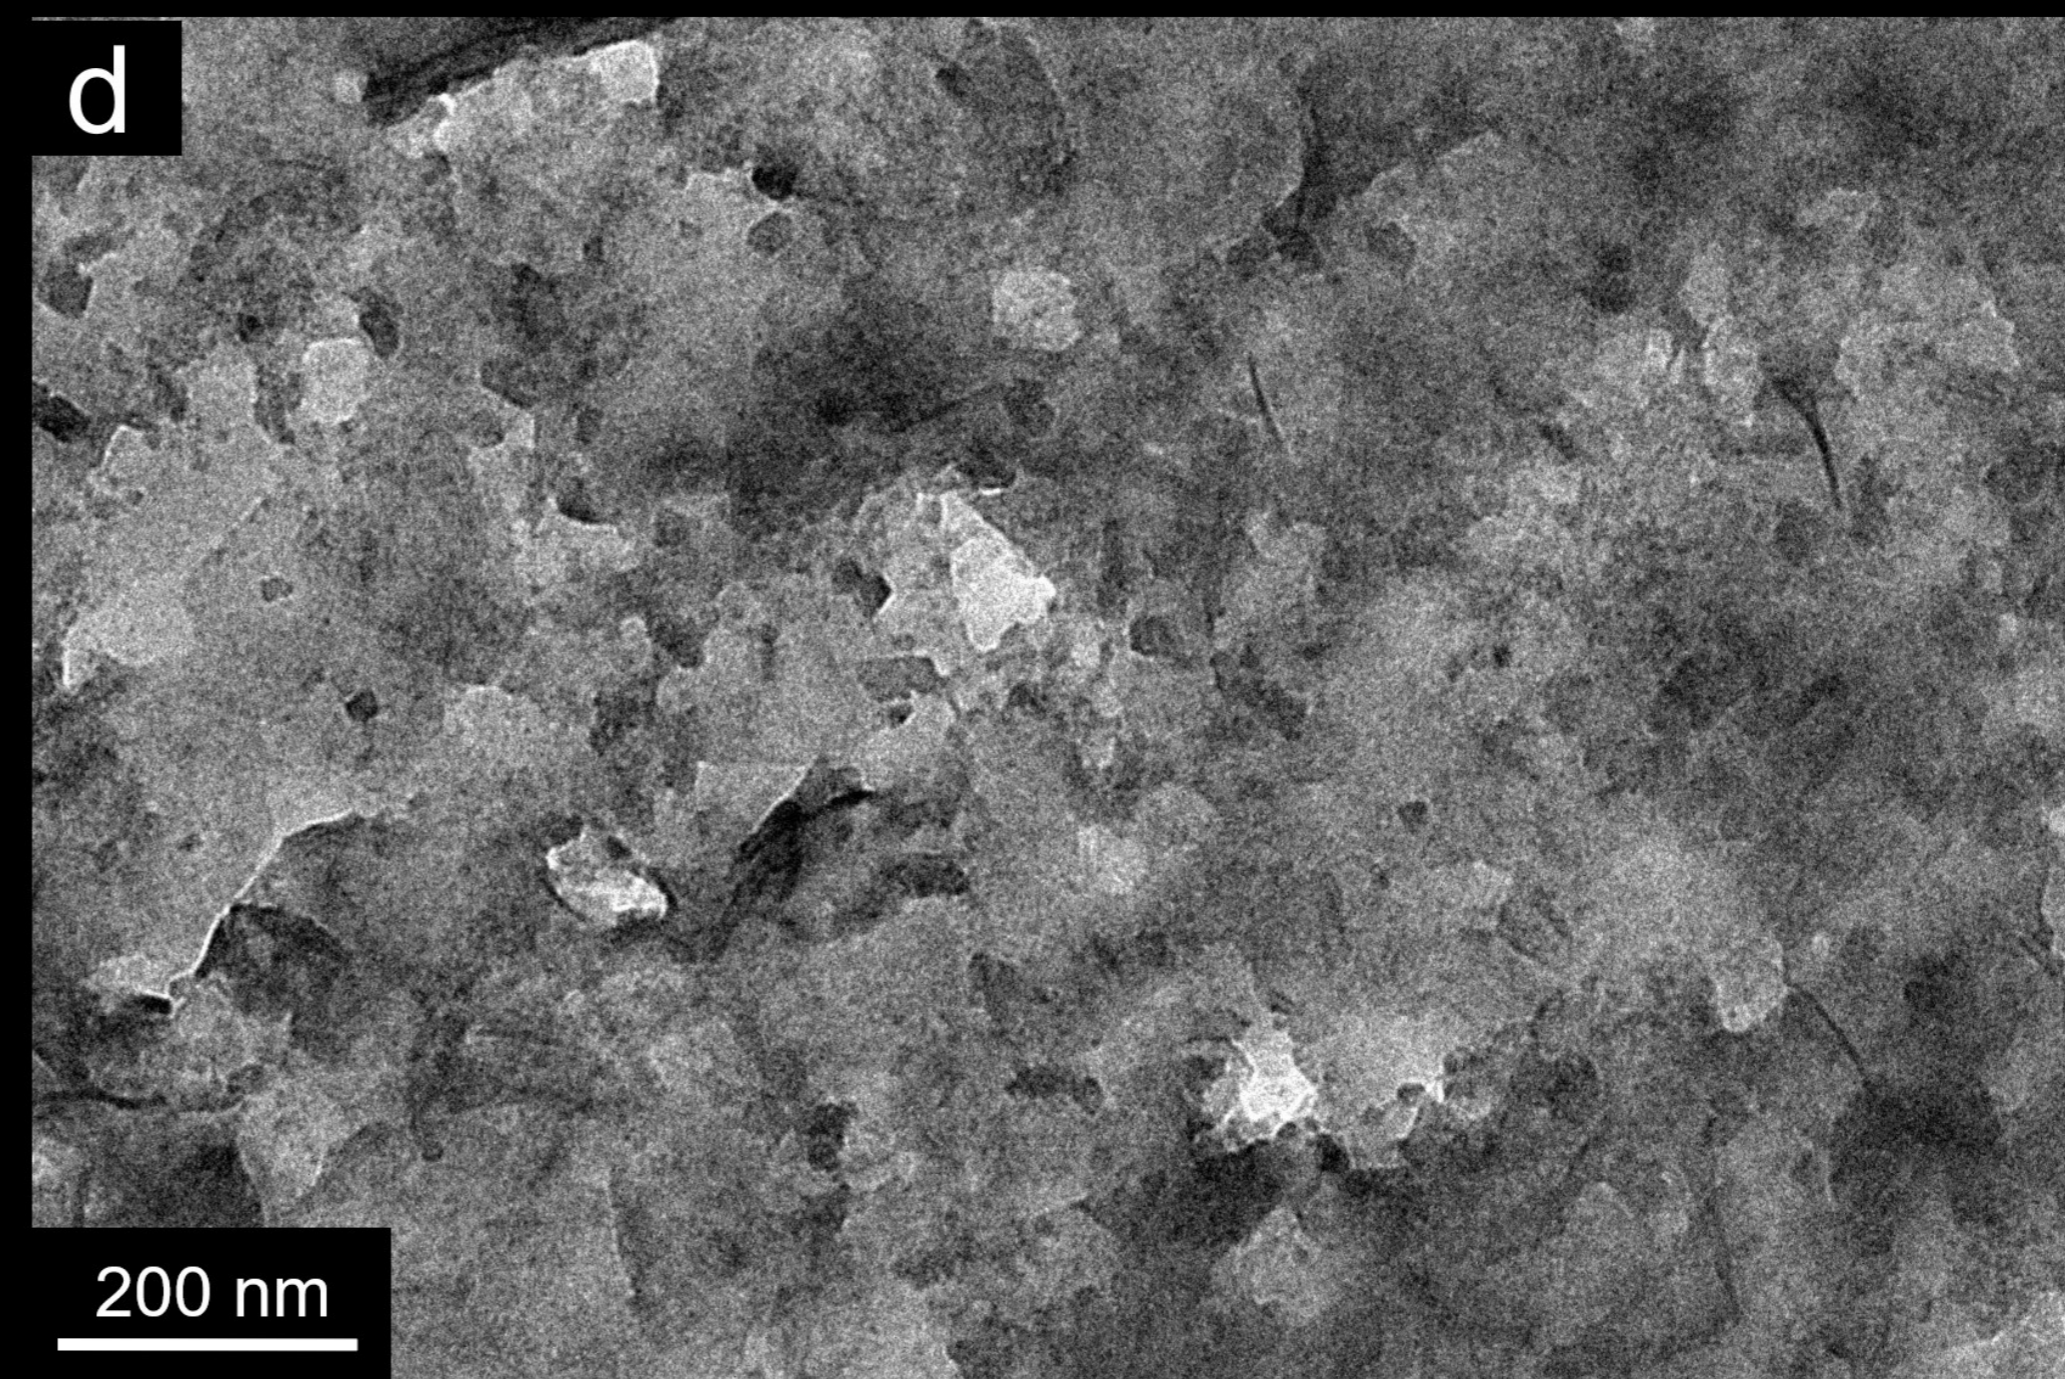

Supplement: d4cc01321b3.pdf [file d4cc01321b3.pdf]

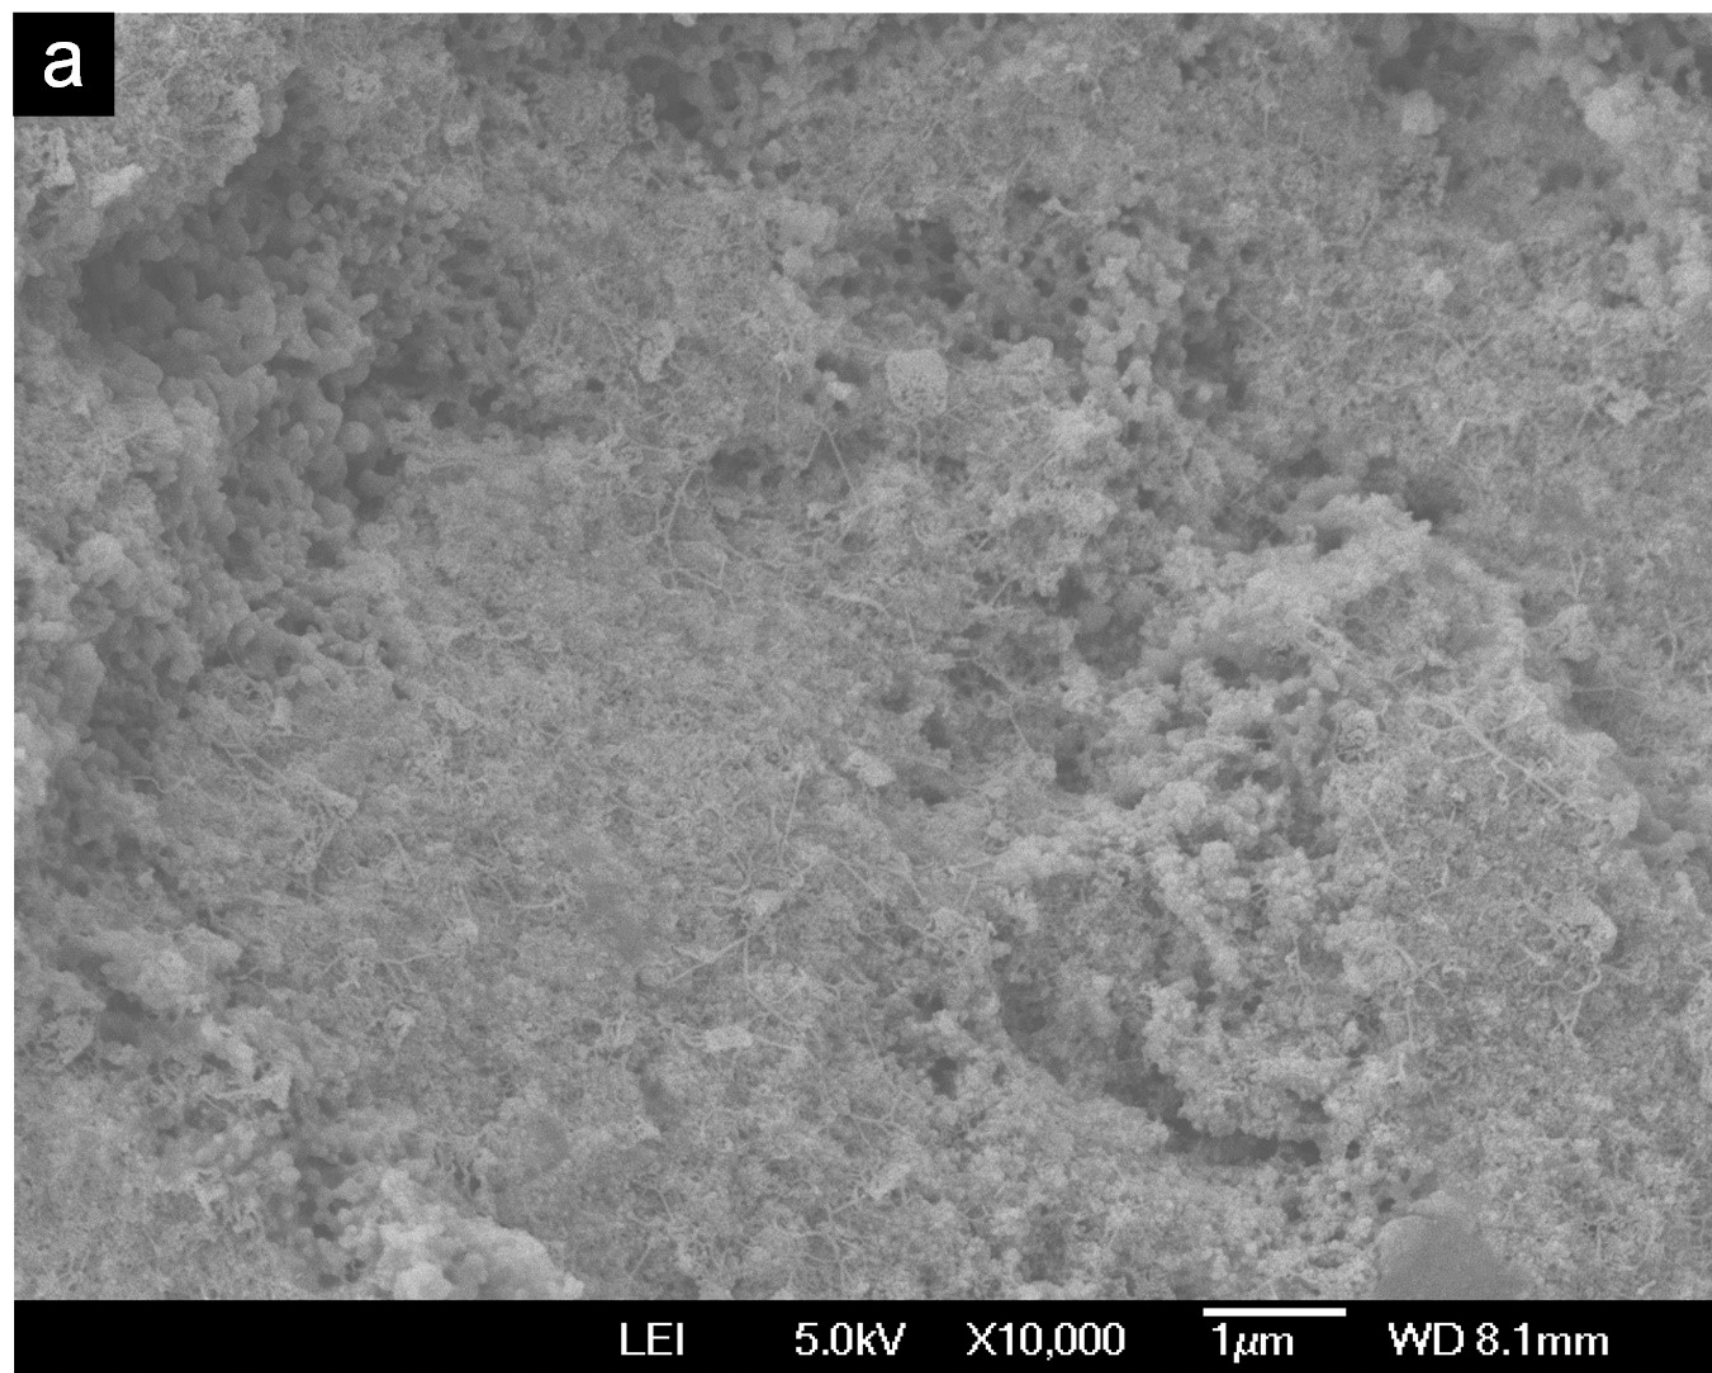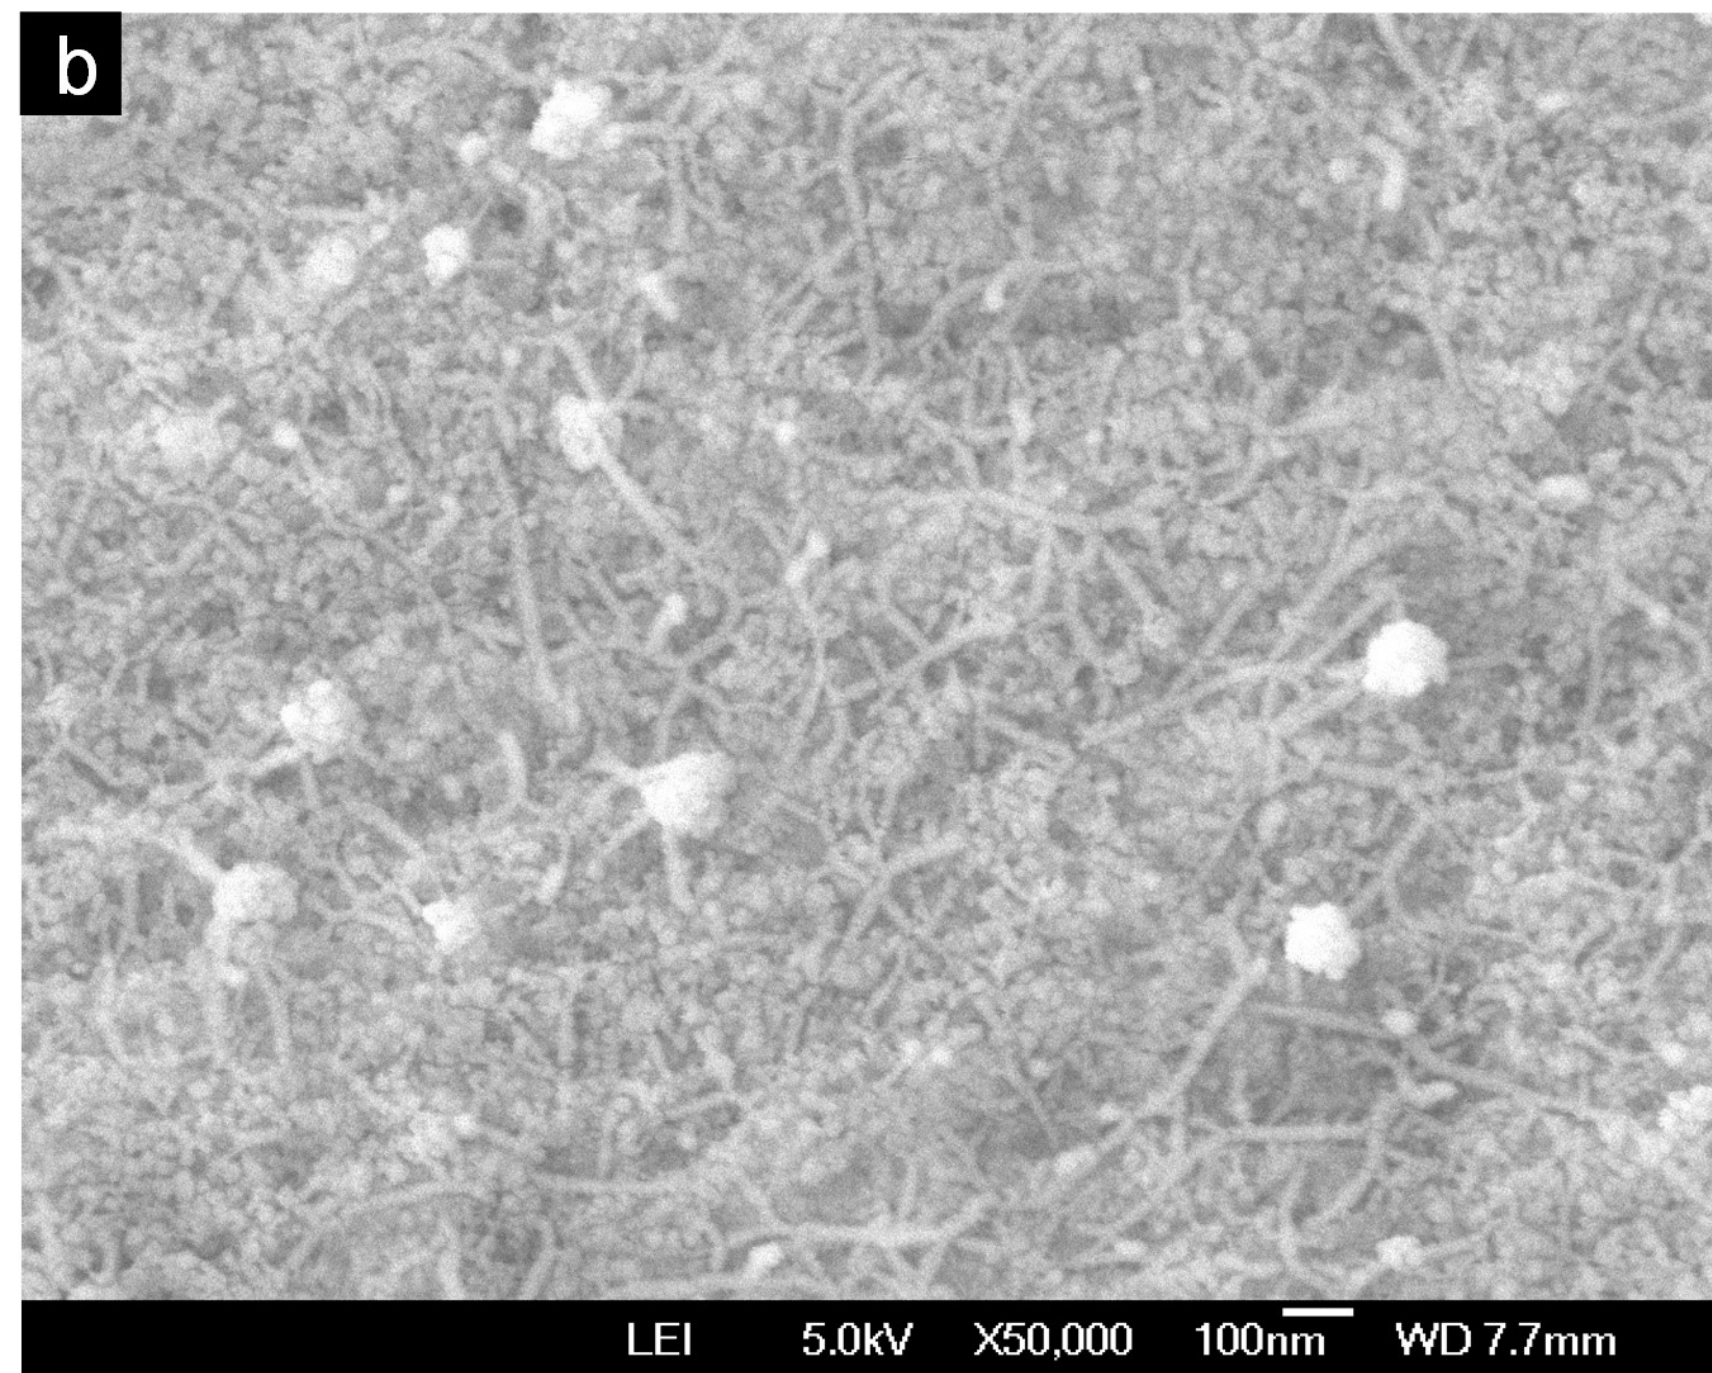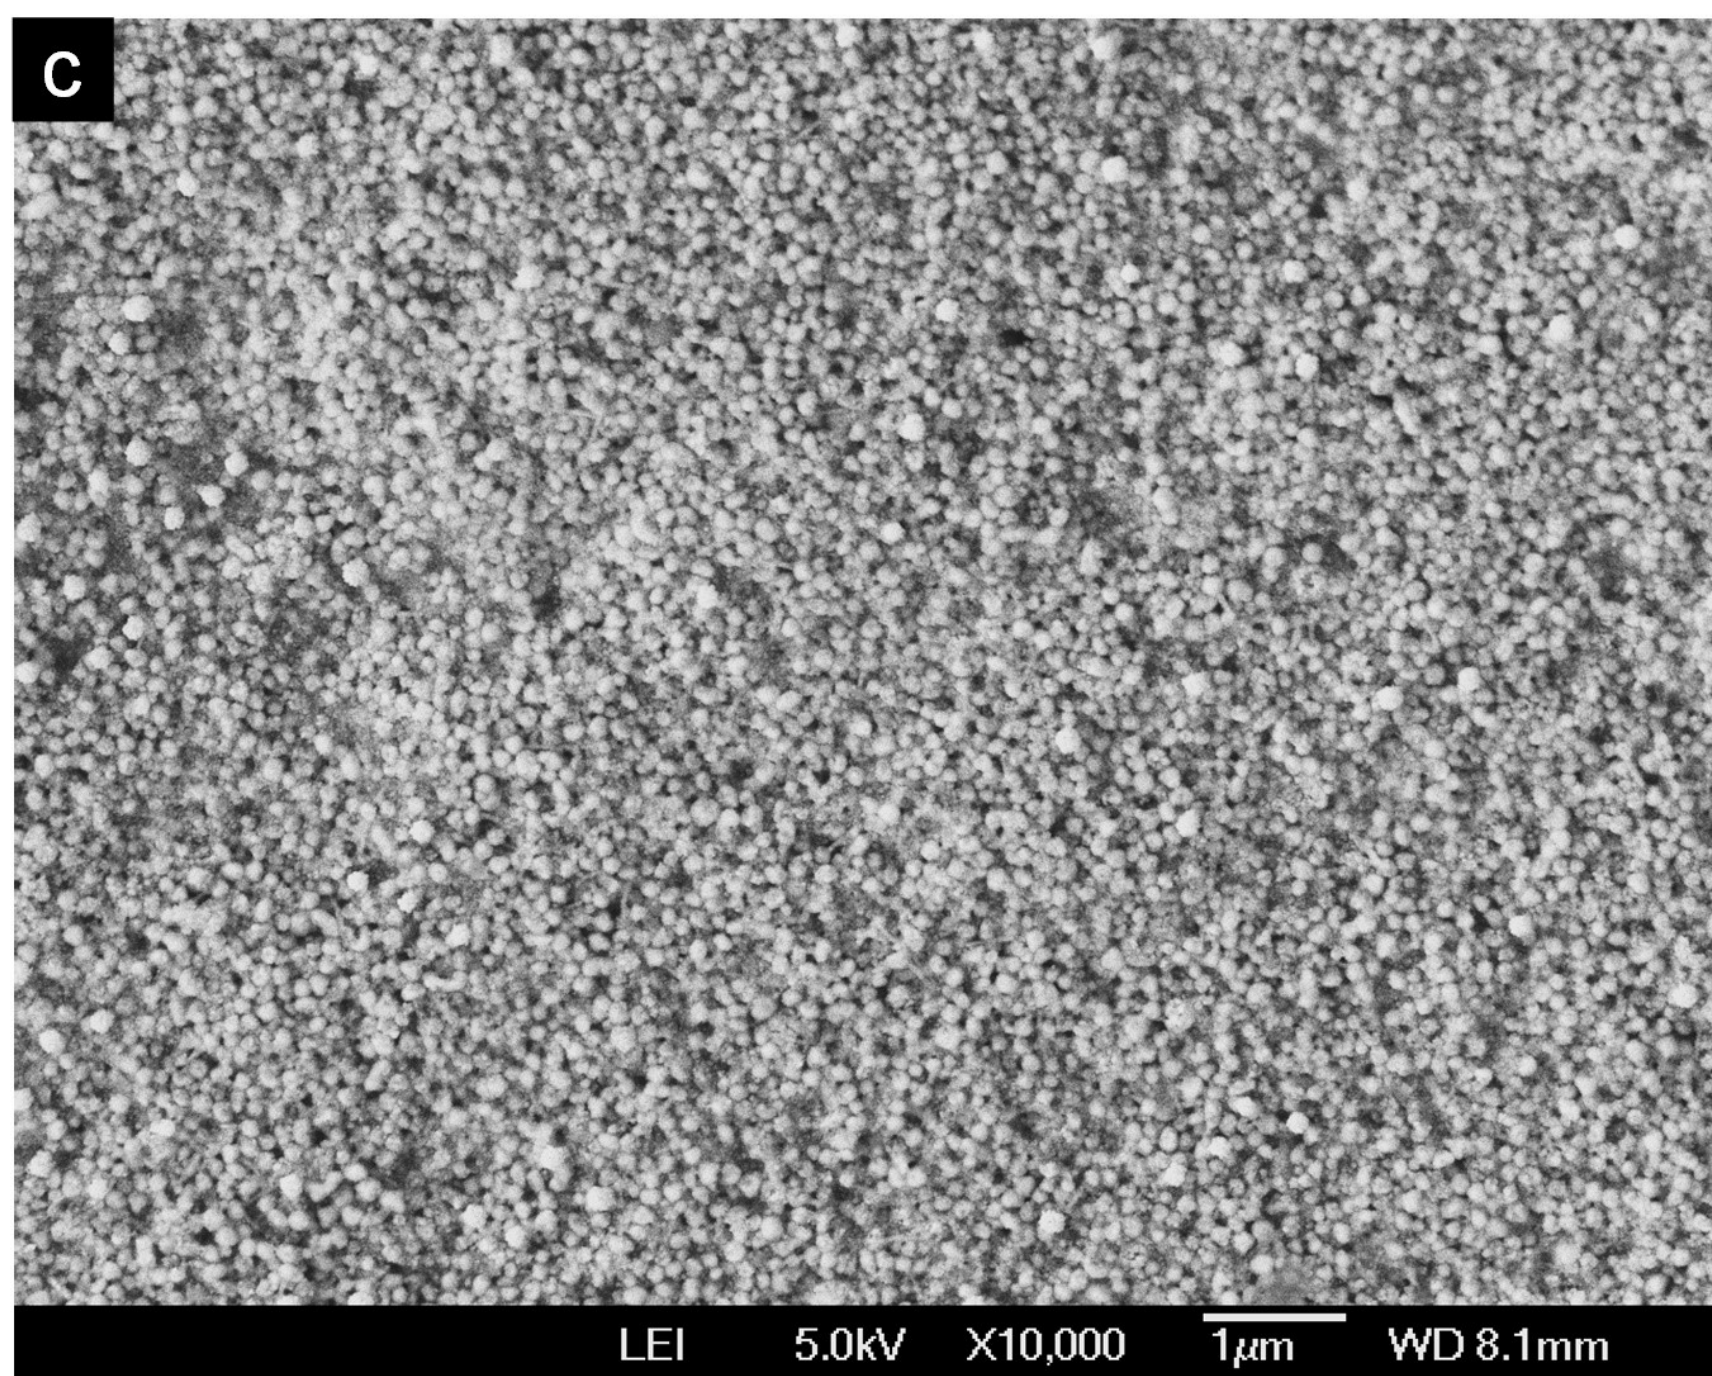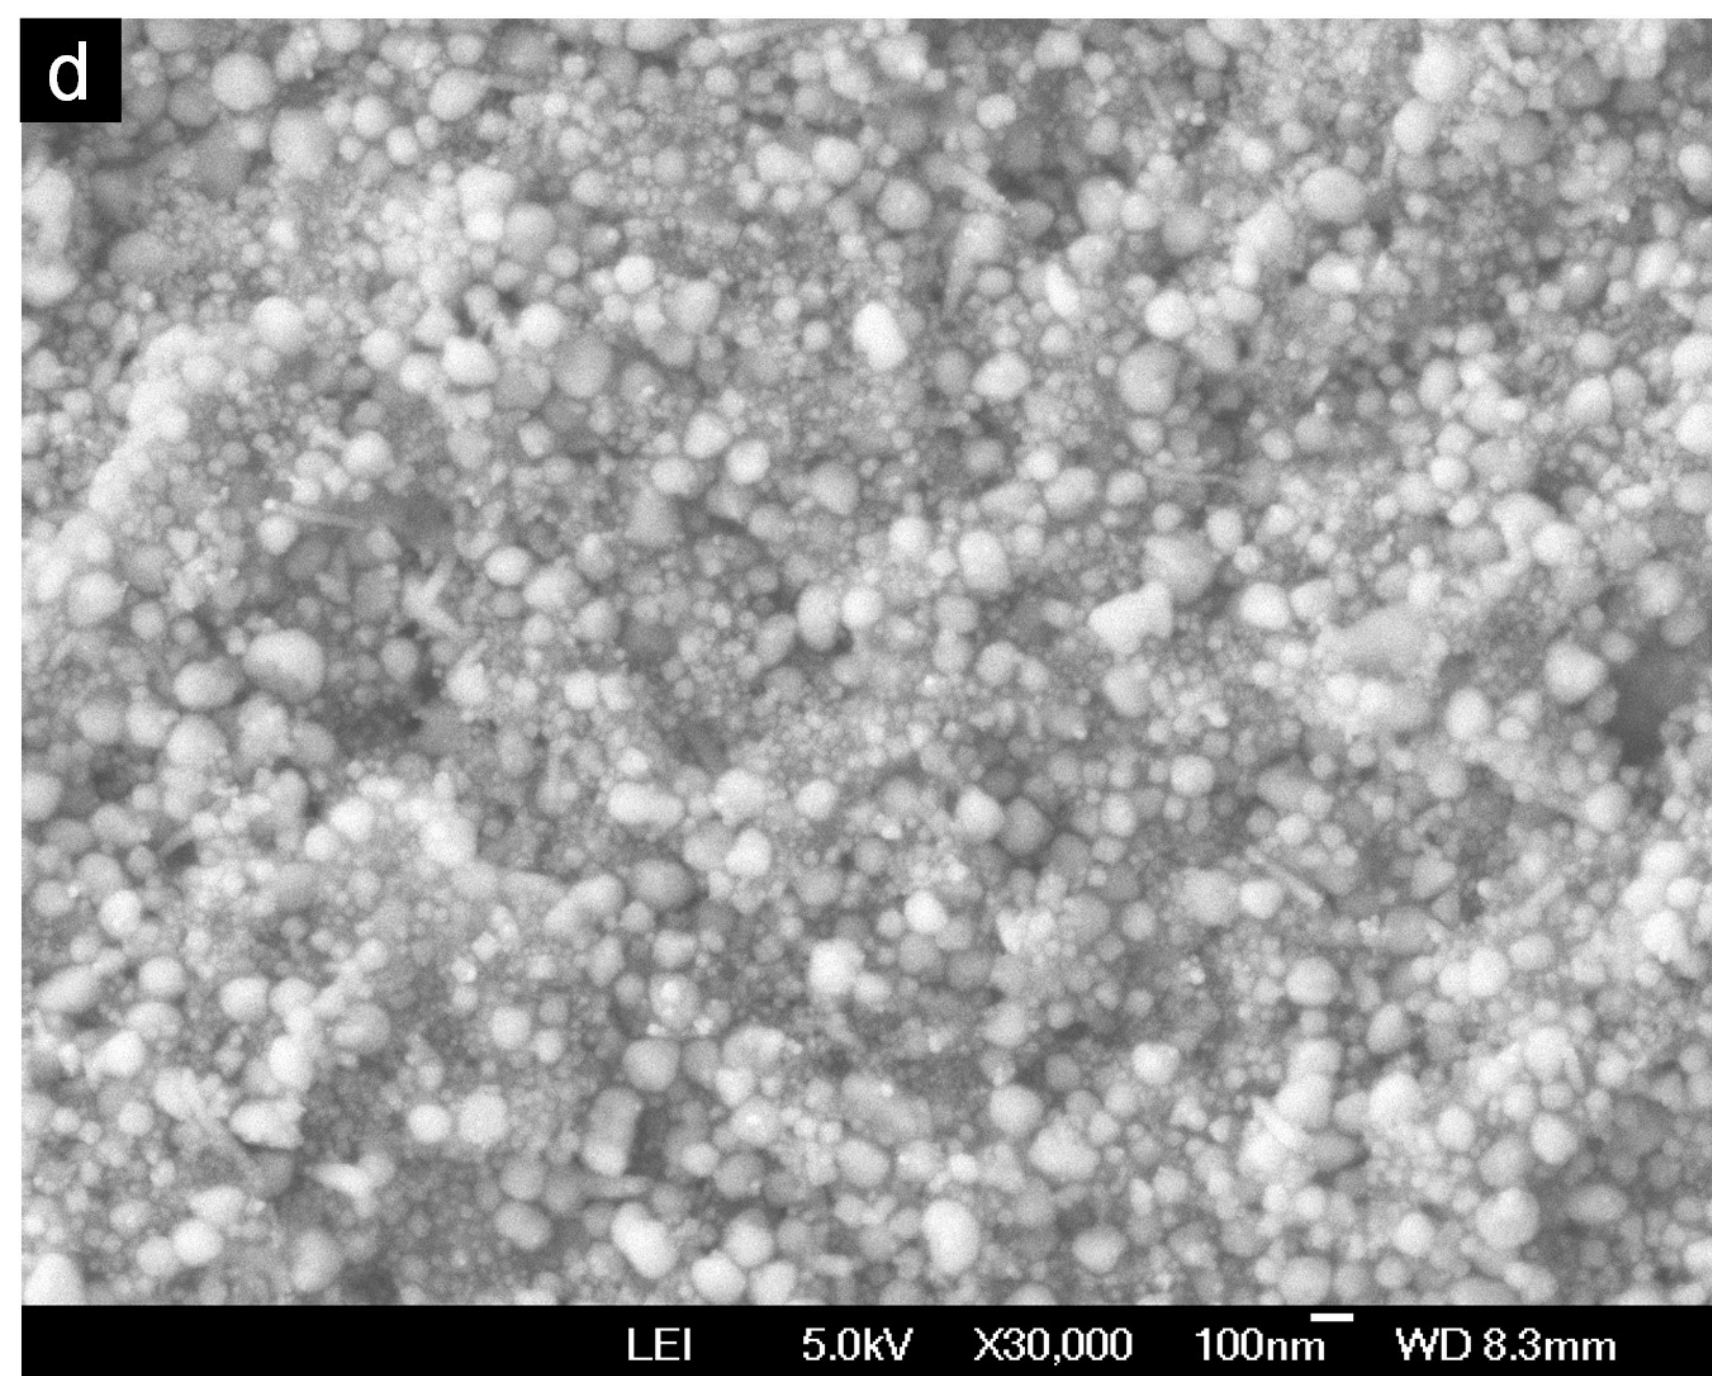

Supplement: d4cc01321b4.pdf [file d4cc01321b4.pdf]

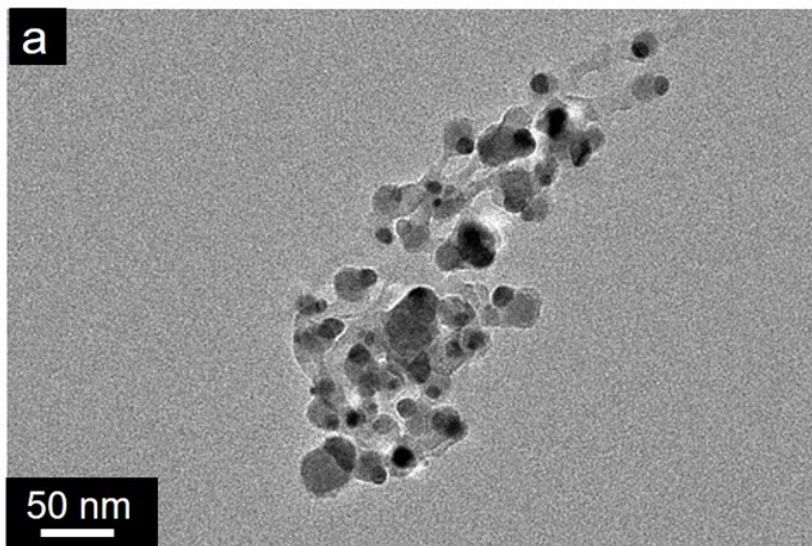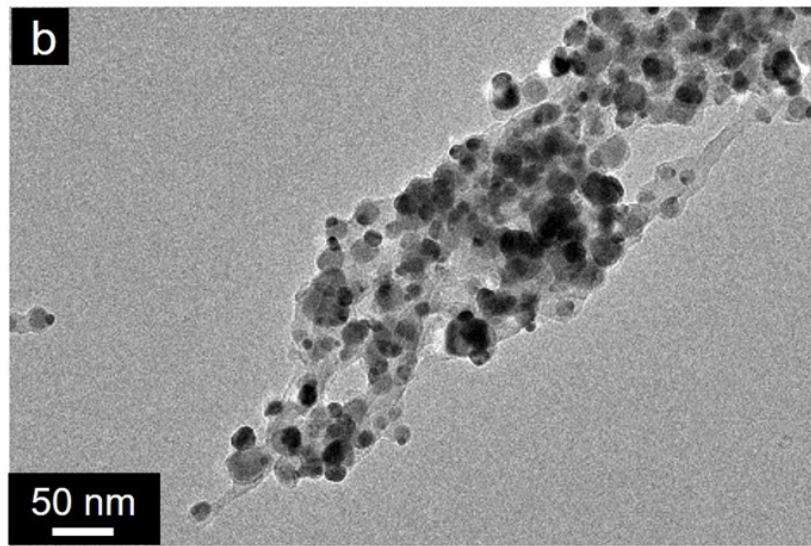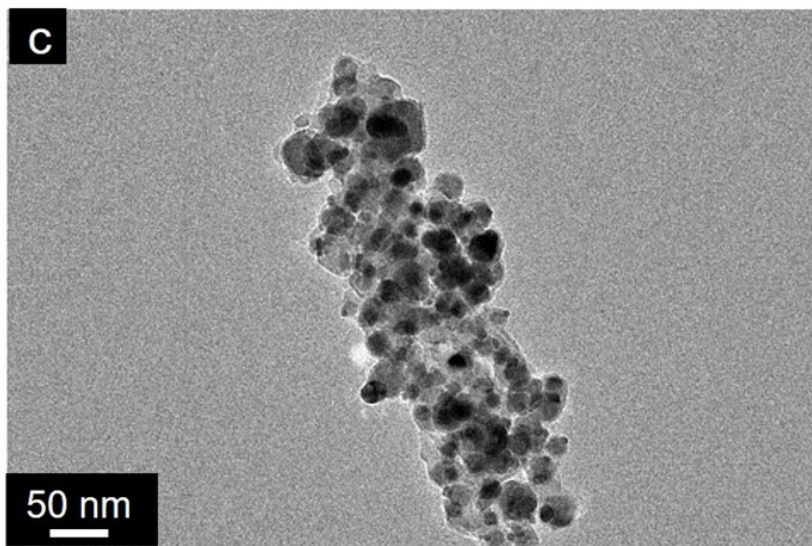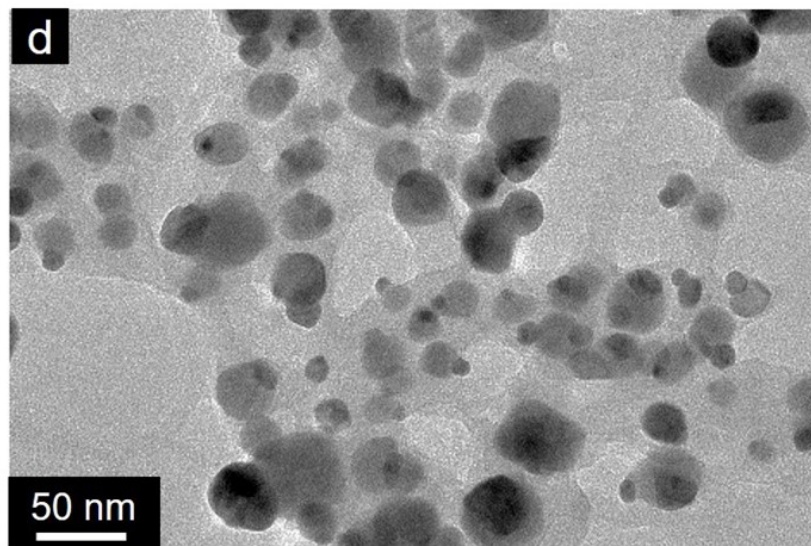

Supplement: d4cc01321b5.pdf [file d4cc01321b5.pdf]

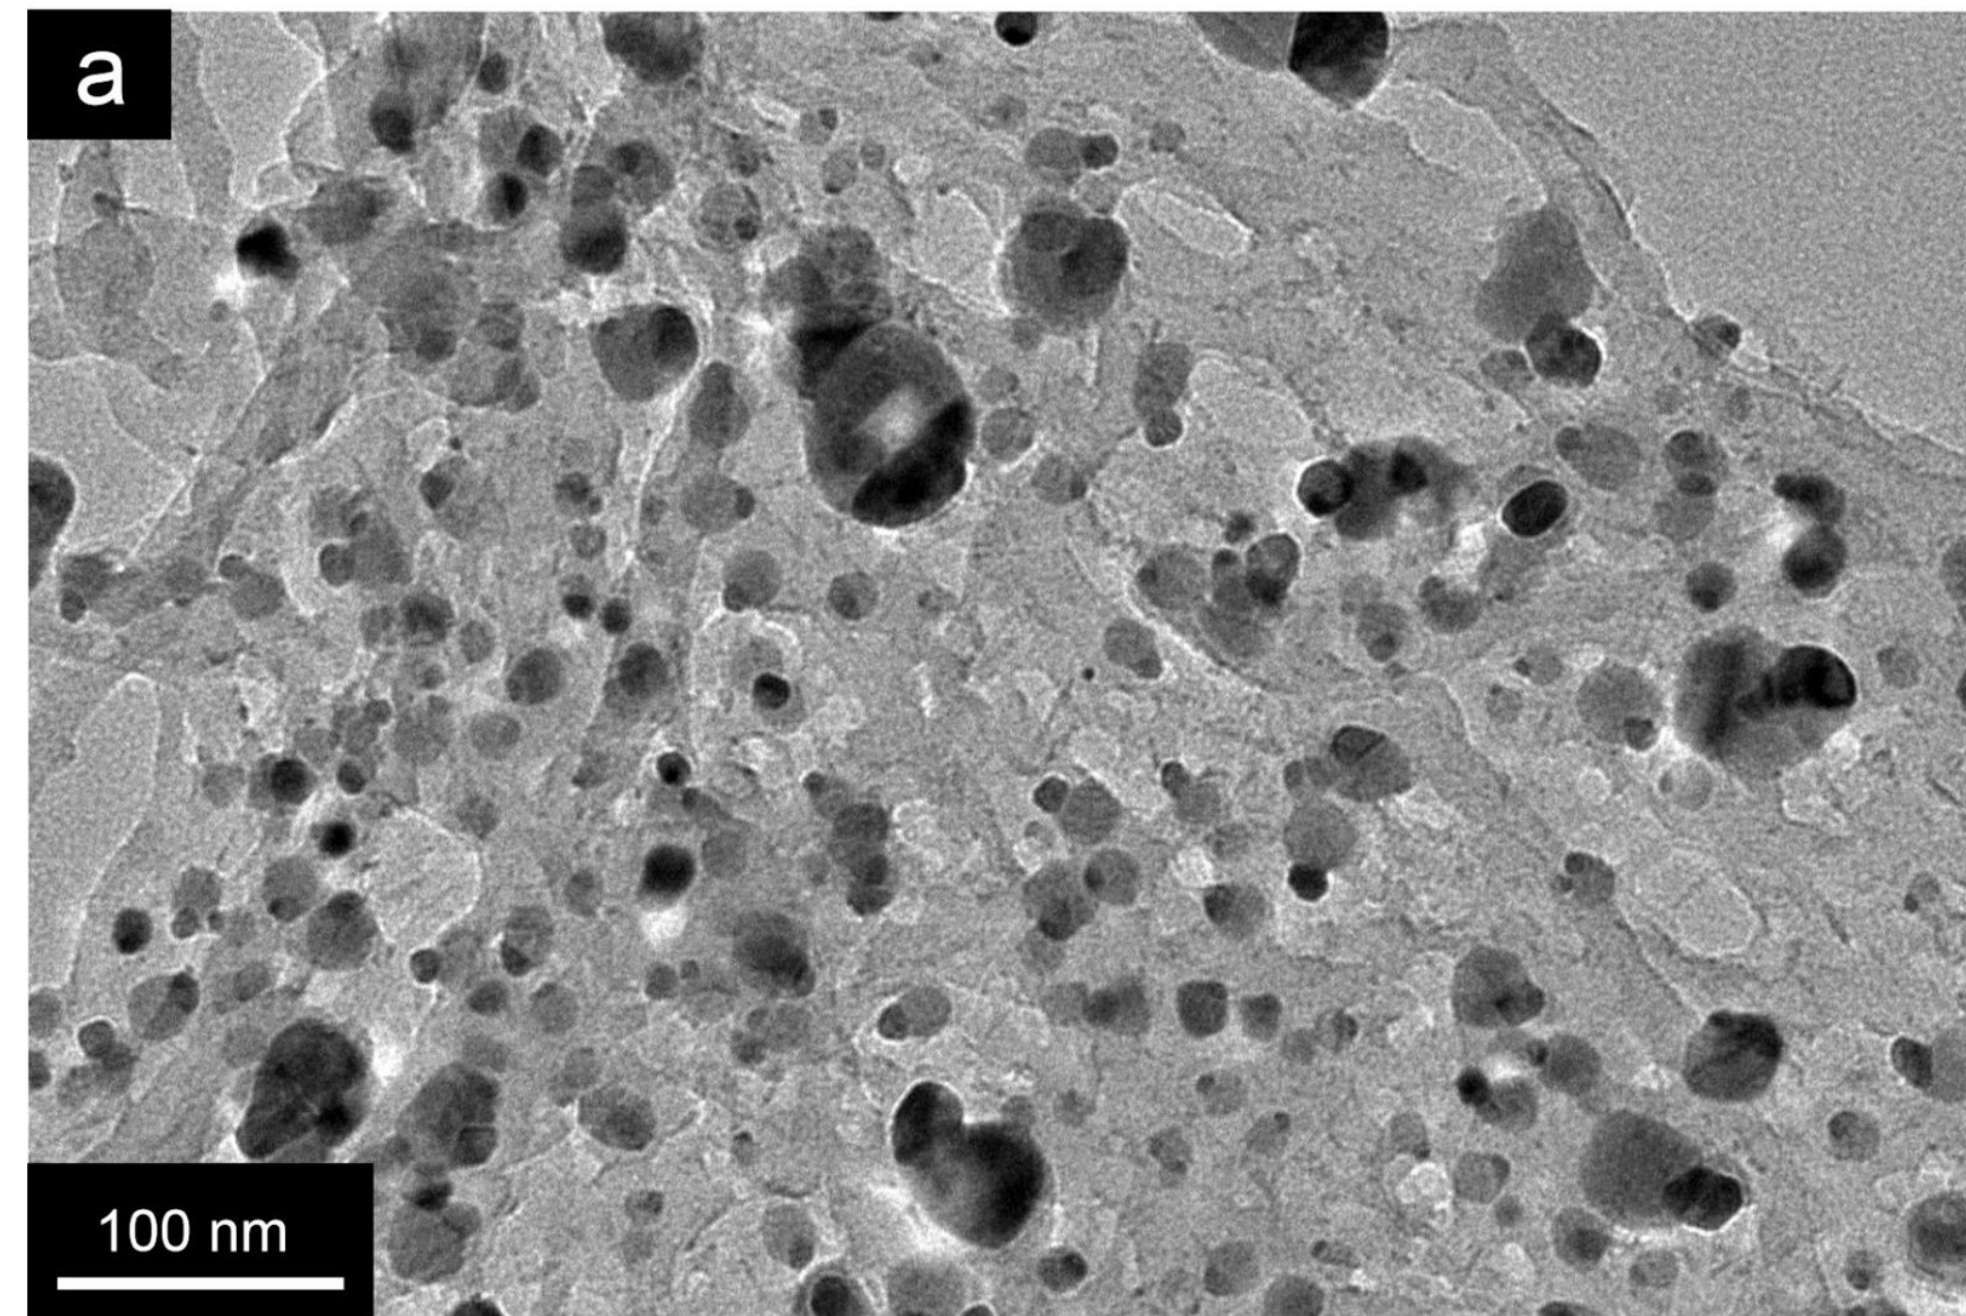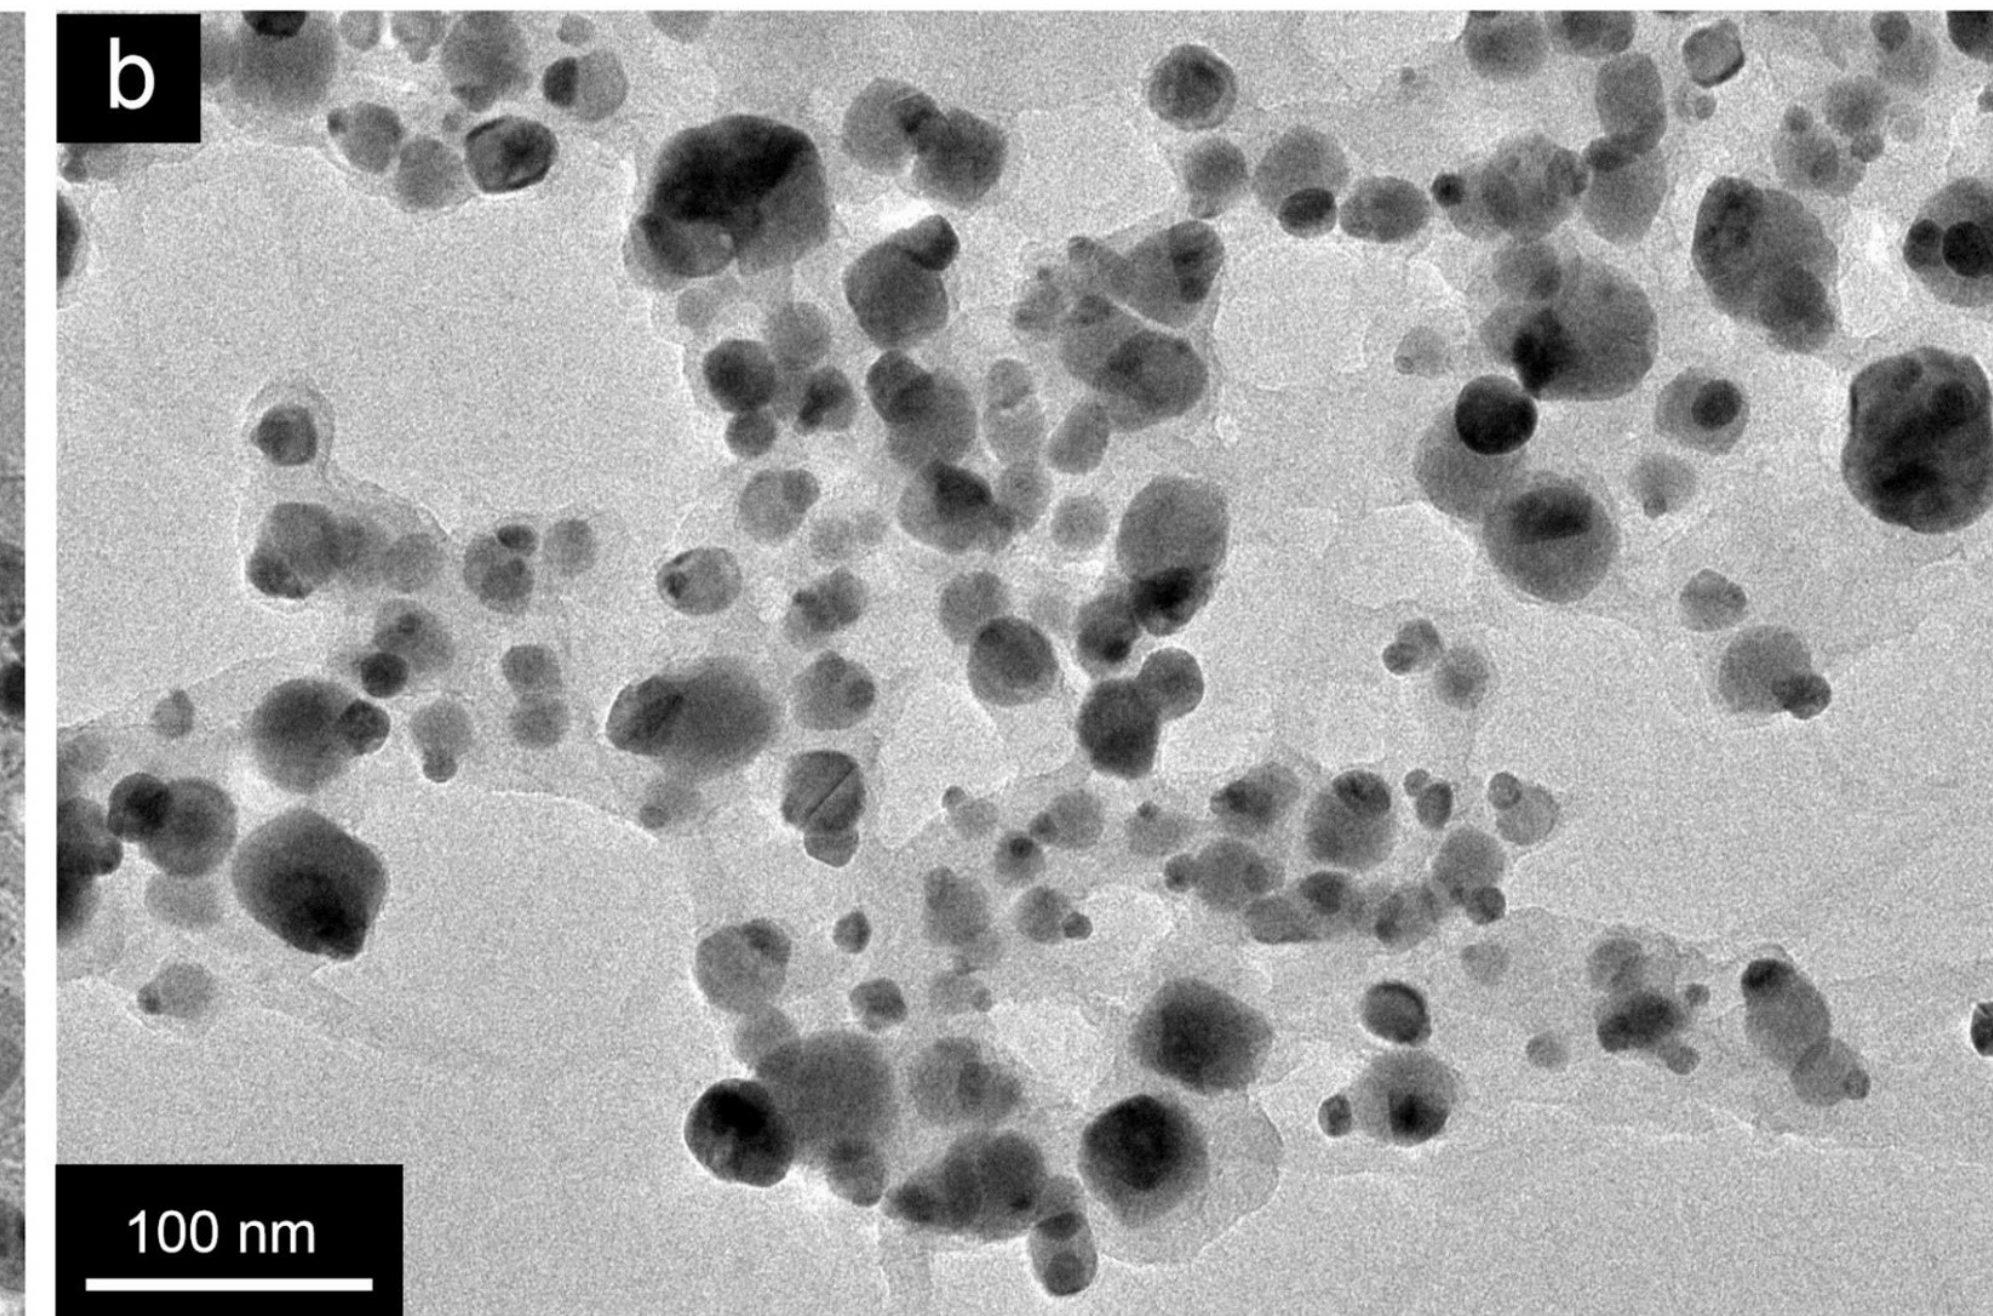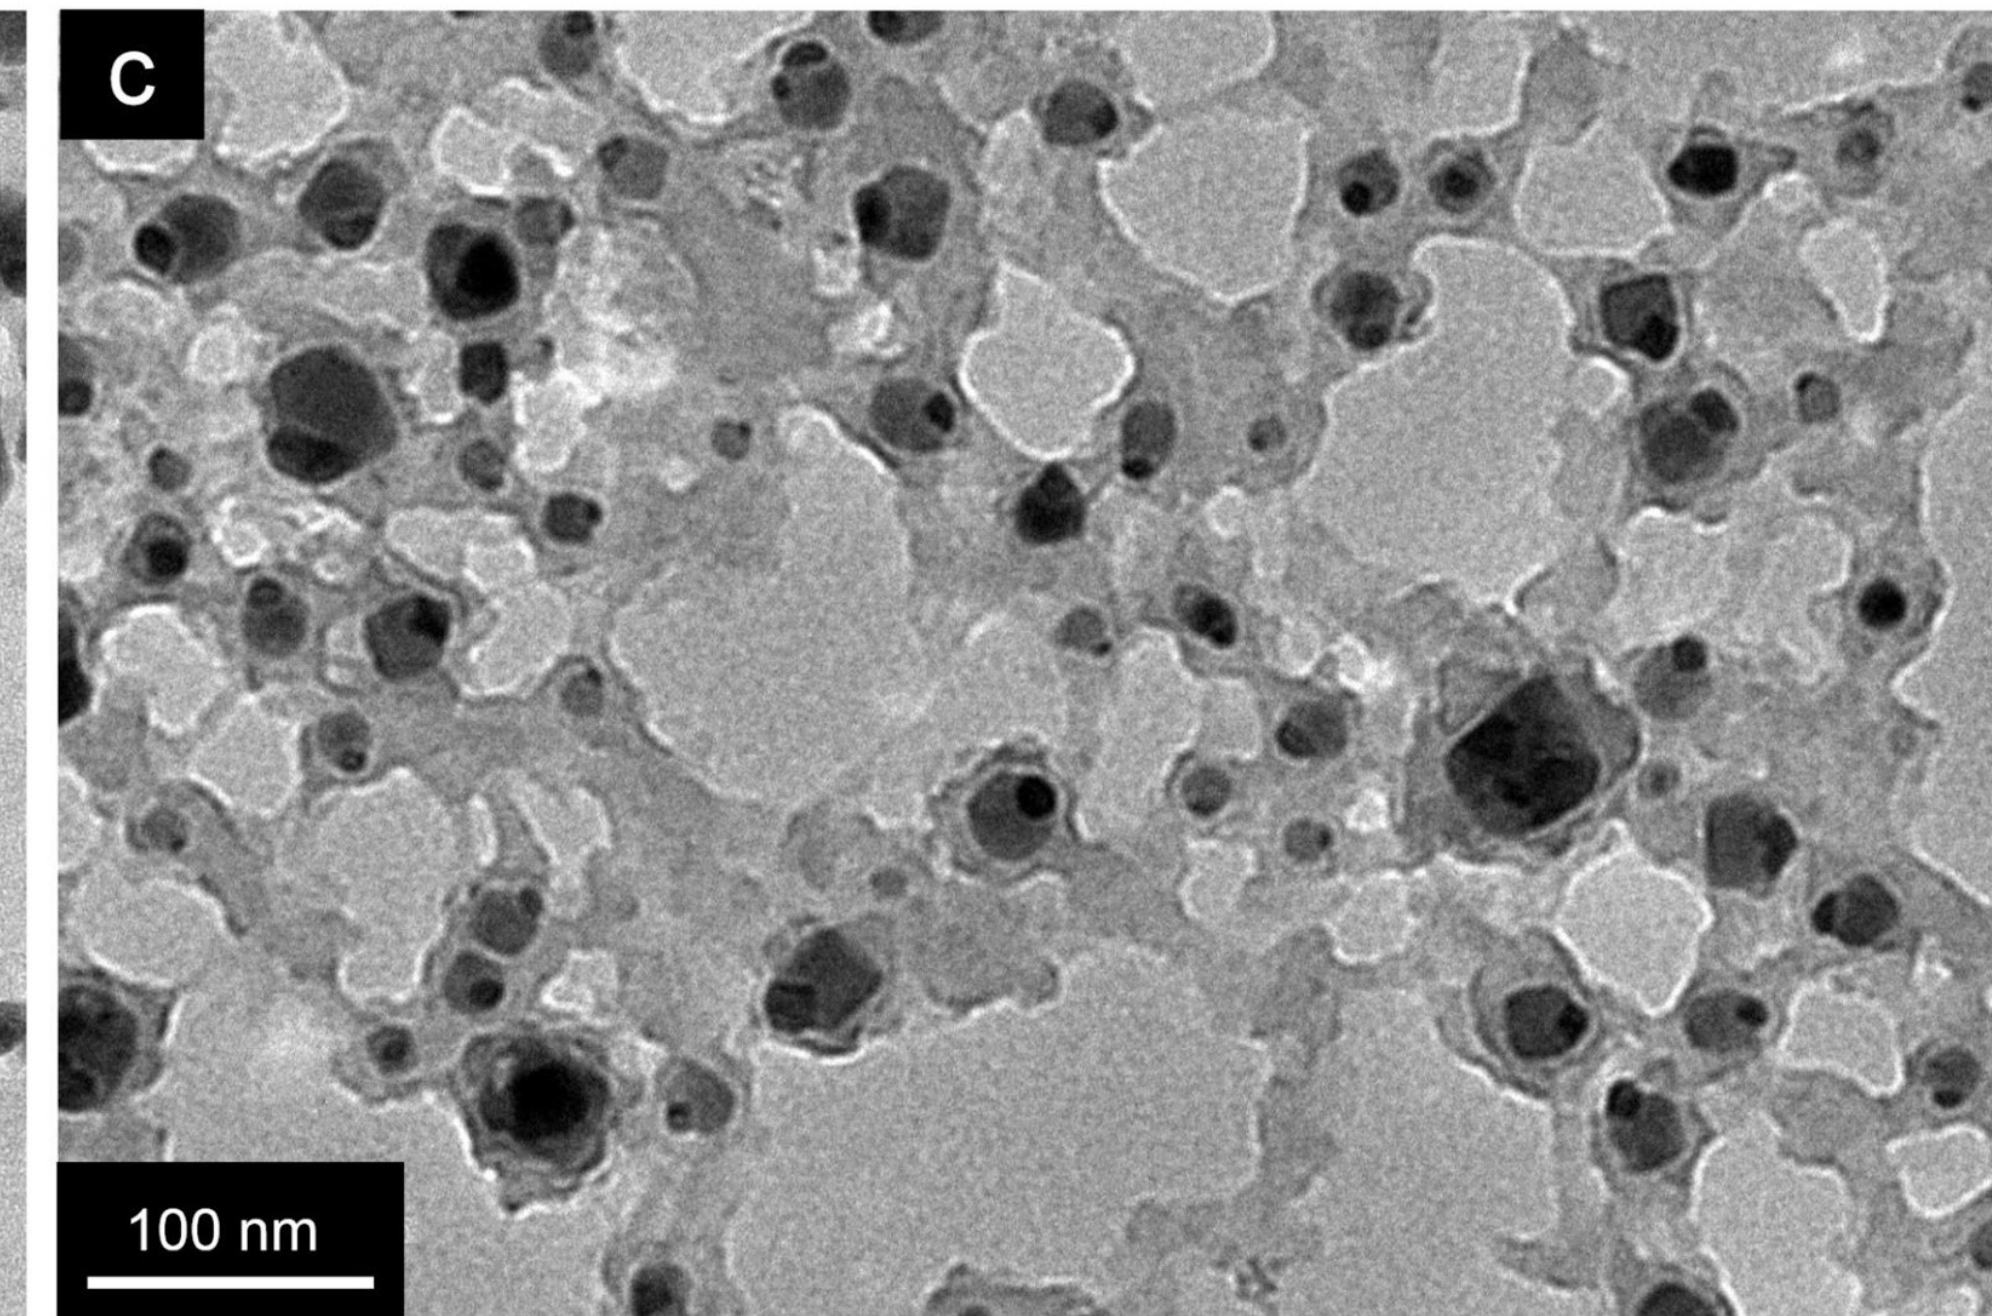

Supplement: d4cc01321b6.pdf [file d4cc01321b6.pdf]

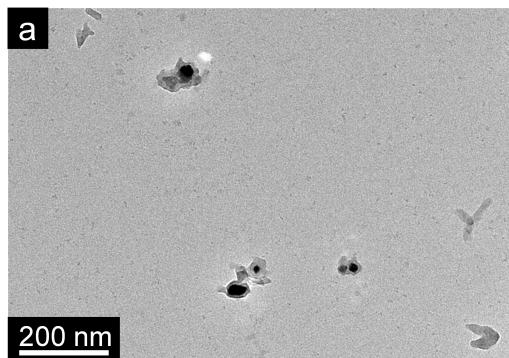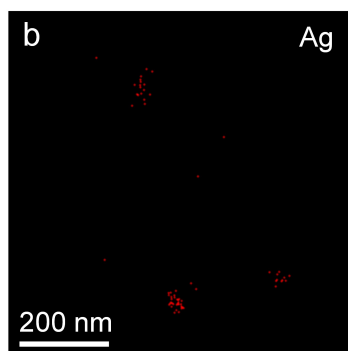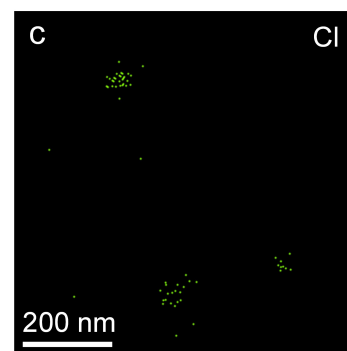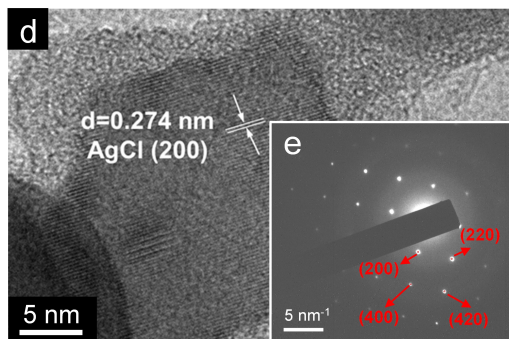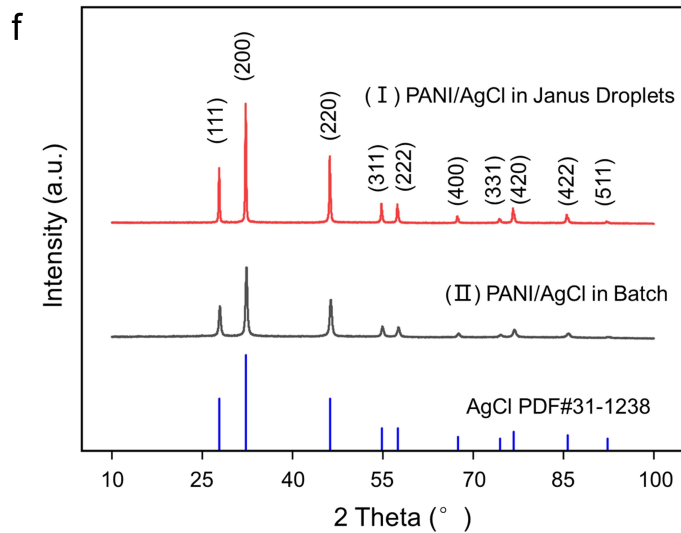

Supplement: d4cc01321b7.pdf [file d4cc01321b7.pdf]

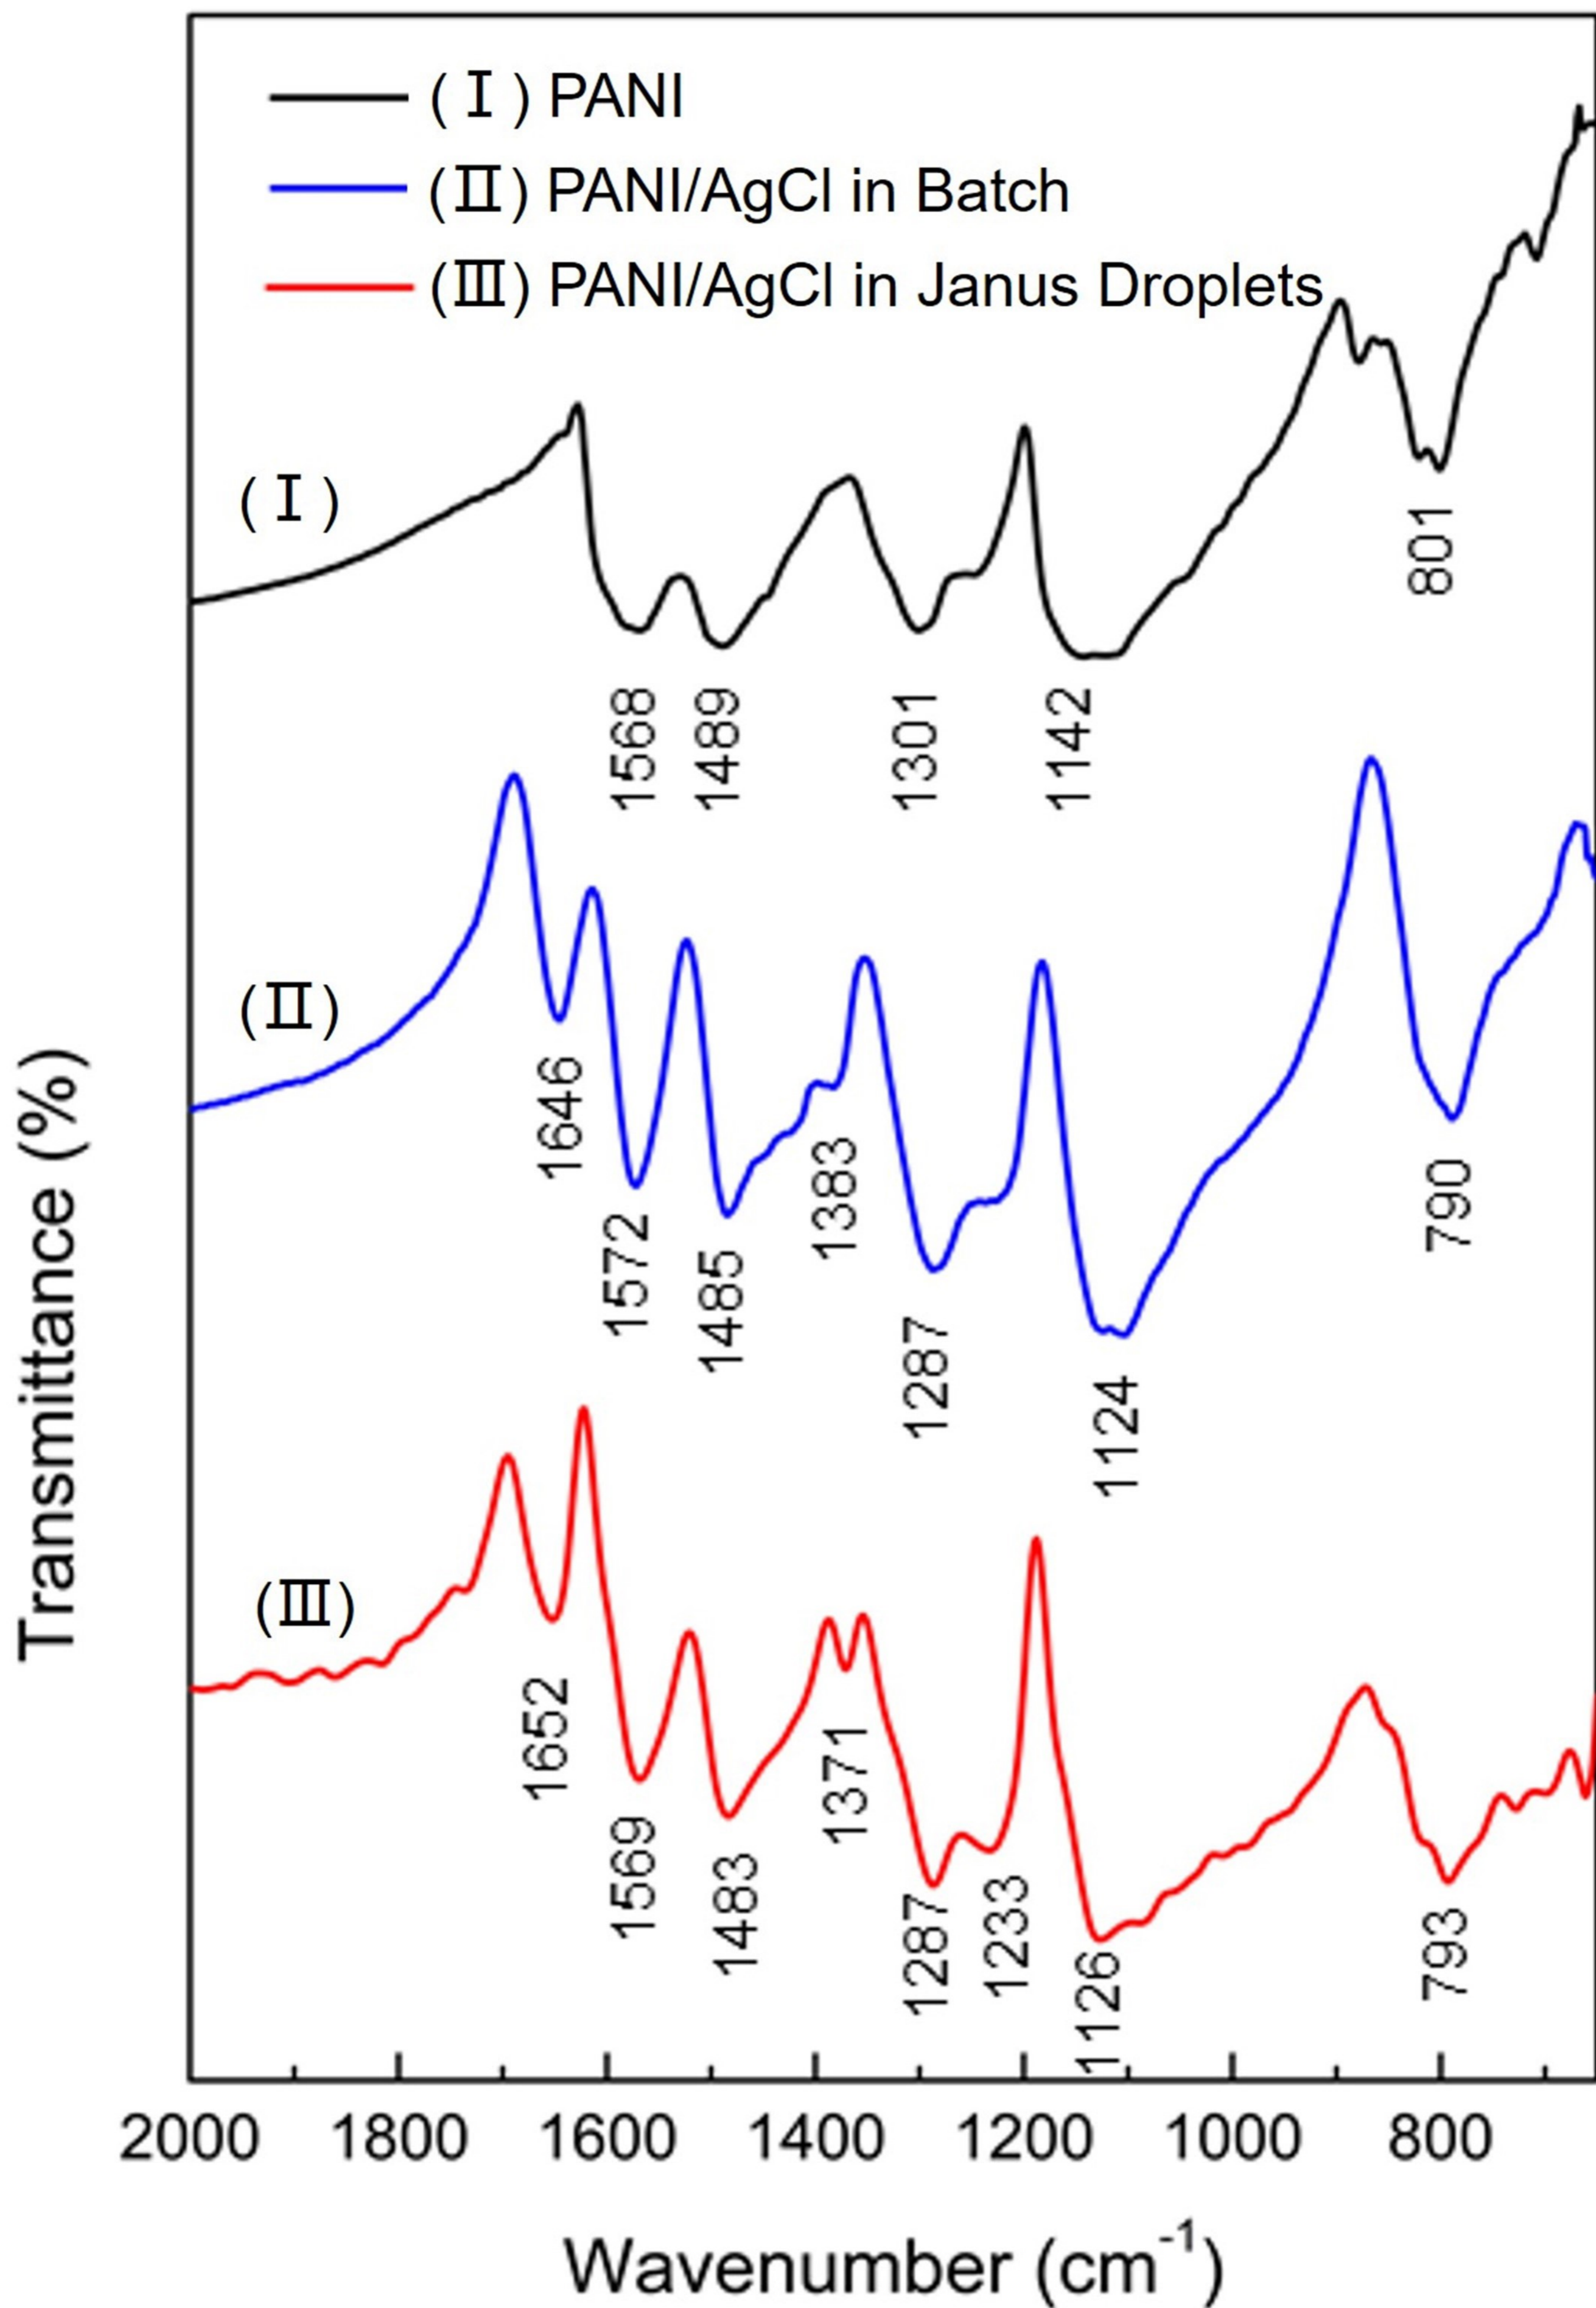

Supplement: d4cc01321b8.pdf [file d4cc01321b8.pdf]
